# Supplementary material for: Comprehensive Mapping of Binding Hot Spots of SARS-CoV-2 RBD-specific Neutralizing Antibodies for Tracking Immune Escape Variants
Source: Research Square preprint supplement (doi:10.21203/rs.3.rs-497595/v1), 2021-05-06
Supplement: Supplementary file 1 [file 9f9bce825304d0f8a164548c.xlsx]

## Sheet: Sheet1
Neutralization level	mAbs	Cross reactivity	Antigenic sites
High	24-9λ	N	2,3
	24-27K	N	1,2
	24-26K	N	1,2
	24-12K	N	2,3
	24-24K	N	1,2
	24-2K	N	1
	24-11λ	N	4
	24-11K	N	1
	24-1 λ	N	1
	25-C4	N	1
	25-F5	N	1
	25-F7	Y	4
	25-D4	N	4
	25-F4	N	4
	25-C5	N	1
	25-D9	Y	4
	25-B10	N	4
	25-C6	N	3
	25-C8	N	1
	25-F8	N	2,3
	25-C9	N	3
	25-B5	N	1, 2
	26-26λ	N	1,4
	26-43K	N	1,4
	26-34K	N	2
	26-41K	N	1
	26-17λ	N	1,4
	26-34λ	N	1,2
	26-40K	N	1
	26-45K	N	1
	28-15L	N	2, 3
	28-8L	N	1
	28-26K	Y	4
Medium	24-4K	N	1,2
	24-2λ	N	2
	24-38K	N	1,2
	25-B4	N	4
	25-E3	N	1
	25-C10	Y	4
	25-G7	N	1,2
	25-G9	N	2,3
	26-30λ	N	4
	26-19λ	N	N.D.
	26-29λ	N	4
	28-9K	Y	4
Low	24-22K	N	N.D.
	24-37λ	N	4
	24-10K	N	1,2
	25-E8	Y	4
	26-27λ	N	2,3
	28-5K	N	4
Weak/N.N.	24-3K	N	N.D.
	24-7K	N	N.D.
	24-15K	N	N.D.
	24-21K	N	N.D.
	24-28K	Y	4
	24-31K	Y	4
	24-5λ	N	N.D.
	24-12λ	N	3
	24-13λ	Y	4
	24-14λ	N	N.D.
	24-31λ	Y	4
	24-6λ	N	N.D.
	24-7λ	N	N.D.
	25-D7	N	N.D.
	25-E9	N	N.D.
	25-B3	Y	4
	25-B6	N	N.D.
	25-B8	N	N.D.
	25-G8	N	3
	25-E8	Y	4
	26-33K	N	N.D.
	26-42K	N	N.D.
	26-50K	N	4
	26-15λ	N	N.D.
	26-16λ	N	N.D.
	26-18λ	Y	3
	26-21λ	Y	4
	26-25λ	N	N.D.
	26-28λ	N	N.D.
	26-32λ	Y	3
	26-36λ	N	N.D.
	26-38λ	N	4
	28-6K	N	N.D.
	28-10K	N	N.D.
	28-11K	N	N.D.
	28-18K	N	N.D.
	28-2L	N	N.D.
	28-13L	N	N.D.
	28-14K	N	N.D.
	28-15K	N	N.D.
	28-27L	N	4
	28-31L	N	N.D.
	28-33 L	N	N.D.
N, not cross- reactivity ; Y, cross-reacitvity; N.D., not determined
High, ≤ 50ng/ml; Medium, 50-500ng/ml; low, 500-5000ng/ml; Weak/N.N., ≥5000ng/ml or not neutralizing
				,l
